# Supplementary material
Source: PubMed Central journal article supplement (PMC6593895)
Supplement: fj.201802281R.sf1.pdf [file fj.201802281R.sf1.pdf]

# Supplemental Figure 1

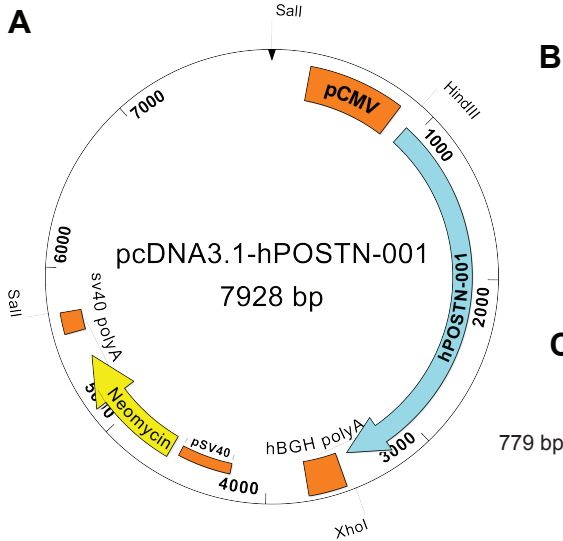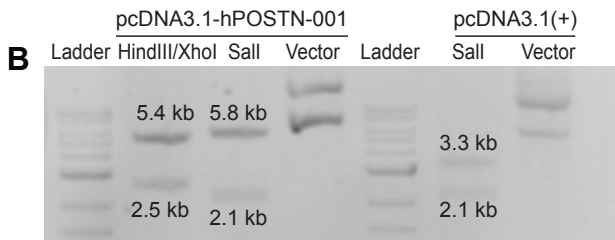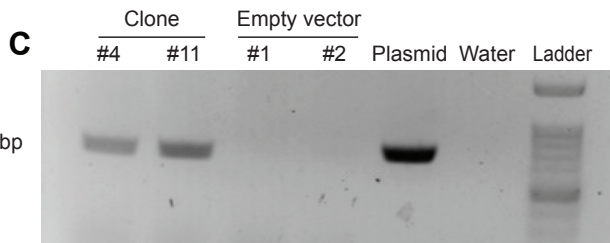

**Supplemental Figure 1: Plasmid map, identification of recombinant plasmid by restriction digestion and amplification of transgene.** A. The plasmid map of the constructed pcDNA3.1-hPOSTN-001. CMV: the enhancer/promoter of the cytomegalovirus immediate early genes, hPOSTN-001: human periostin isoform 1 cDNA, SV40: simian virus 40 promoter, Neomycin: the neomycin resistant gene. The restriction endonuclease recognition (RE) sites used for the insertion of the hPOSTN-001 coding sequence are indicated in light blue while RE recognition sites used for screening are shown as black arrow. B. Agarose gel of HindIII/XhoI or Sall digested plasmid DNA from bacterial transformed with the ligation mixture to generate pcDNA3.1-hPOSTN-001. Lane 1 (from left to right): DNA ladder, Lane 2: HindIII and XhoI digestion fragments, Lane 3: Sall digestion fragments, Lane 4: non-digested vector, Lane 5: DNA ladder; Lane 6: pcDNA3.1(+) plasmid with Sall digestion and Lane 7: non-digested vector. The minor DNA species represent denatured plasmid DNA. C. Cleaving of pcDNA3.1-hPOSTN-001 with EcoRI and Sall. The hPOSTN-001 gene with 779-bp sized fragment was observed in two individual positive recombinant plasmids (#4 and #11). Two clones (#1 and #2) harboring empty vector showed no such bands.
