# Supplementary material
Source: PubMed Central journal article supplement (PMC6593895)
Supplement: fj.201802281R.sf2.pdf [file fj.201802281R.sf2.pdf]

## Supplemental Figure 2

**A**

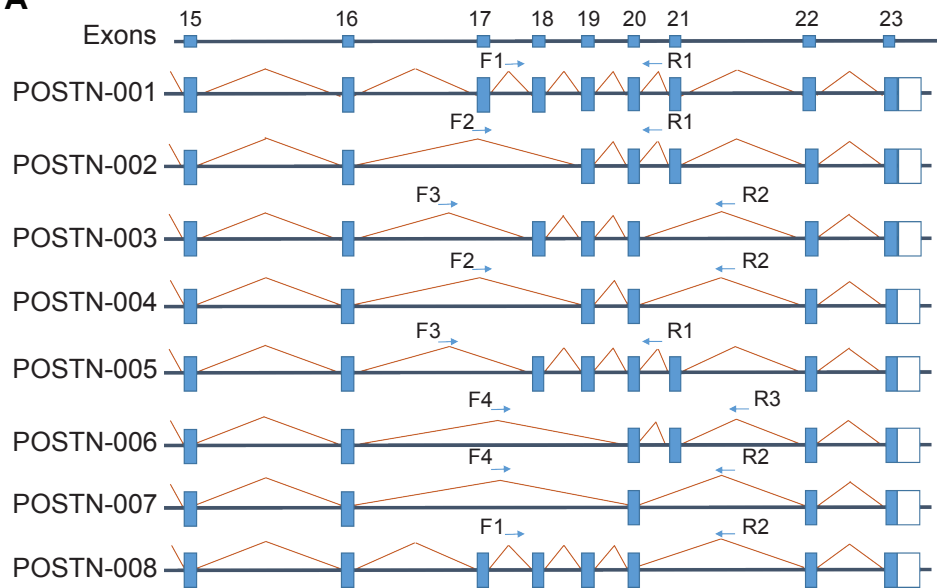

**B**

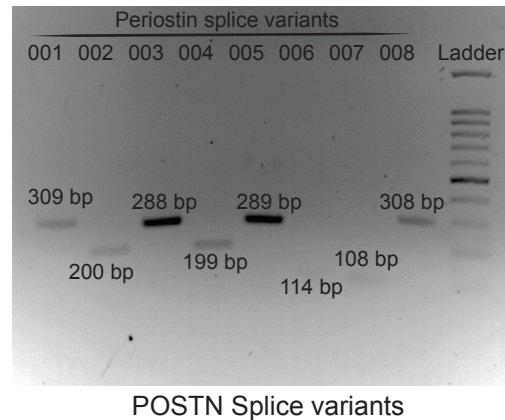

**C**

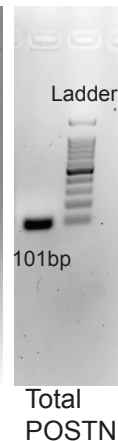

**Supplemental Figure 2: POSTN isoforms location and amplification.** A. Nucleotide sequence of the C-terminal domain of human POSTN isoforms 1-8. Exons (boxed) 15 to 23 (up to the stop codon) are shown. Note that excision of any exon from exon 17 to exon 21 does not induce a frameshift. Moreover, location of forward and reverse primer sets flanking each exon for a particular splice variant that were used for PCR are shown. F: forward primer, R: reverse primer. B. RT-PCR and agarose gel electrophoresis showing specific bands corresponding to amplicon length based on isoform-specific primer sets. C. RT-PCR and agarose gel electrophoresis showing specific band corresponding to amplicon length based on sequence-specific primers.
