# Supplementary material
Source: PubMed Central journal article supplement (PMC6593895)
Supplement: fj.201802281R.sf3.pdf [file fj.201802281R.sf3.pdf]

# Supplemental Figure 3

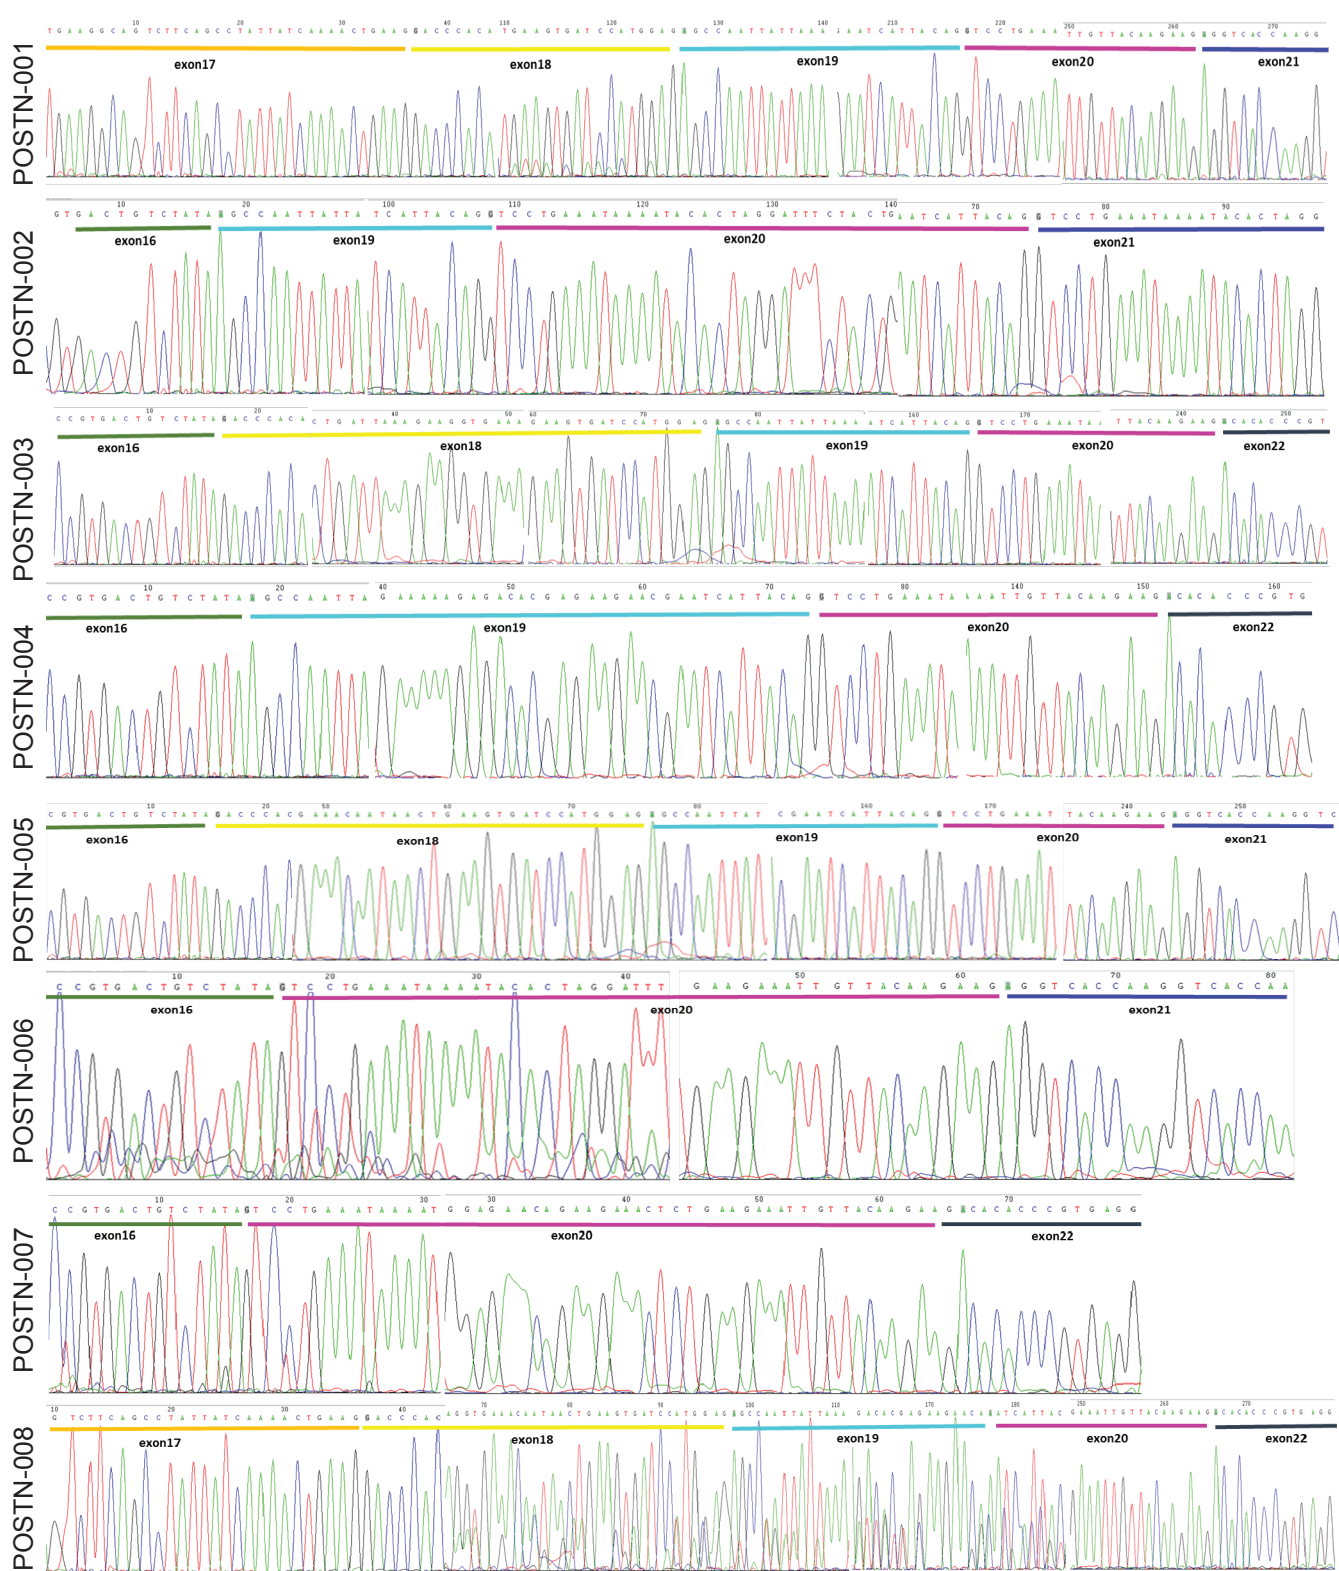

**Supplemental Figure 3: Sequencing electropherograms for all splice variants of POSTN.** Agarose-extracted and purified PCR product of each splice variant was subjected to DNA sequencing yielding isoform specific sequences indicated by 4-tiered coloring peaks with each color representing a nucleotide. Red = T, Green = A, Blue = C, Black = G.
