# Supplementary material
Source: PubMed Central journal article supplement (PMC6593895)
Supplement: fj.201802281R.sf4.pdf [file fj.201802281R.sf4.pdf]

## Supplemental Figure 4

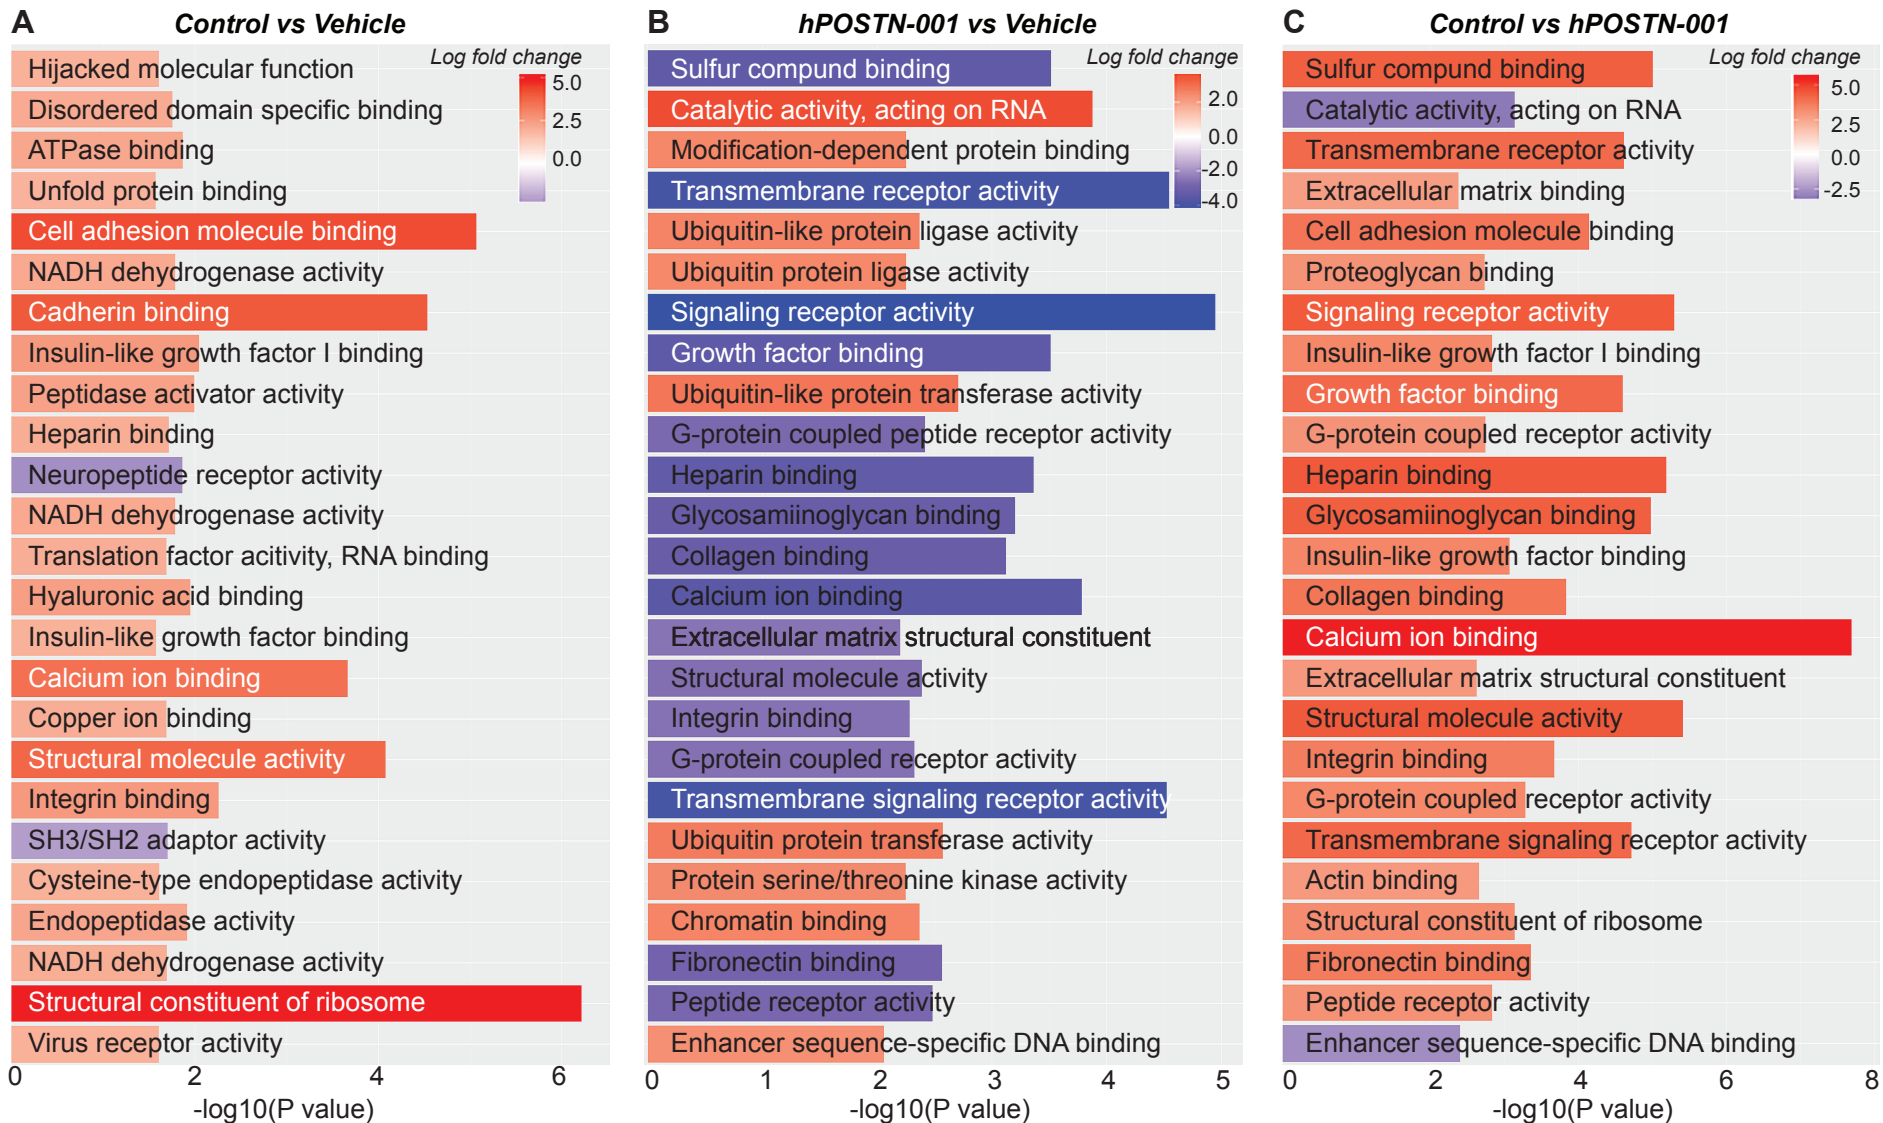

**Supplemental Figure 4: Molecular function of differentially expressed genes.** Barplot of GO biological processes found in the filtered gene list. GAGE\_Global\_FDR is the Benjamini-Hochberg FDR adjusted P value of two single-sided T-tests on all the log<sub>2</sub> fold changes of every gene found in the Limma results that are members of a given GO term. As a result, GAGE used the co-expressed or co-varying nature of genes within GO terms to determine whether they were up or down regulated on a global scale for each statistical comparison. Top 25 significant biological processes for A. control and vehicle, B. hPOSTN-001 and vehicle, C. control and hPOSTN-001.
